# Supplementary material
Source: PubMed Central journal article supplement (PMC9492651)

Figure 6N

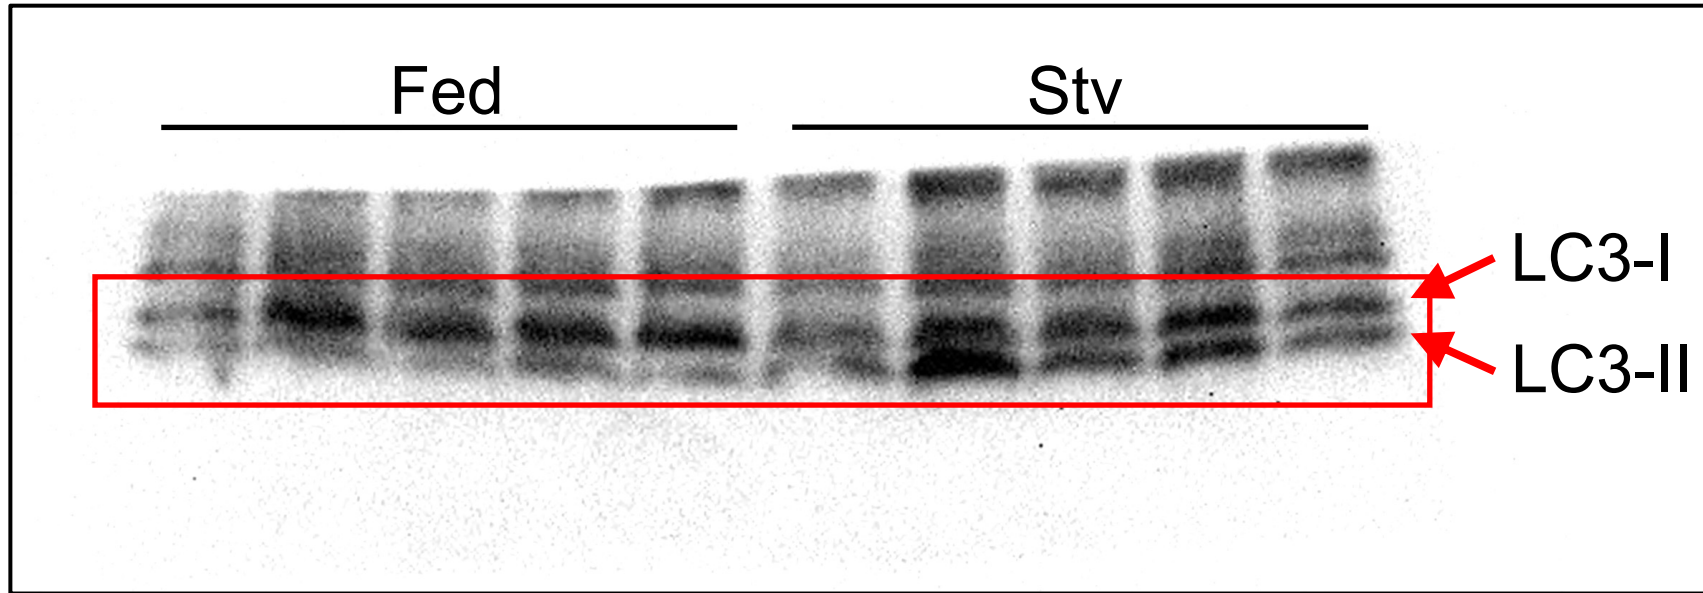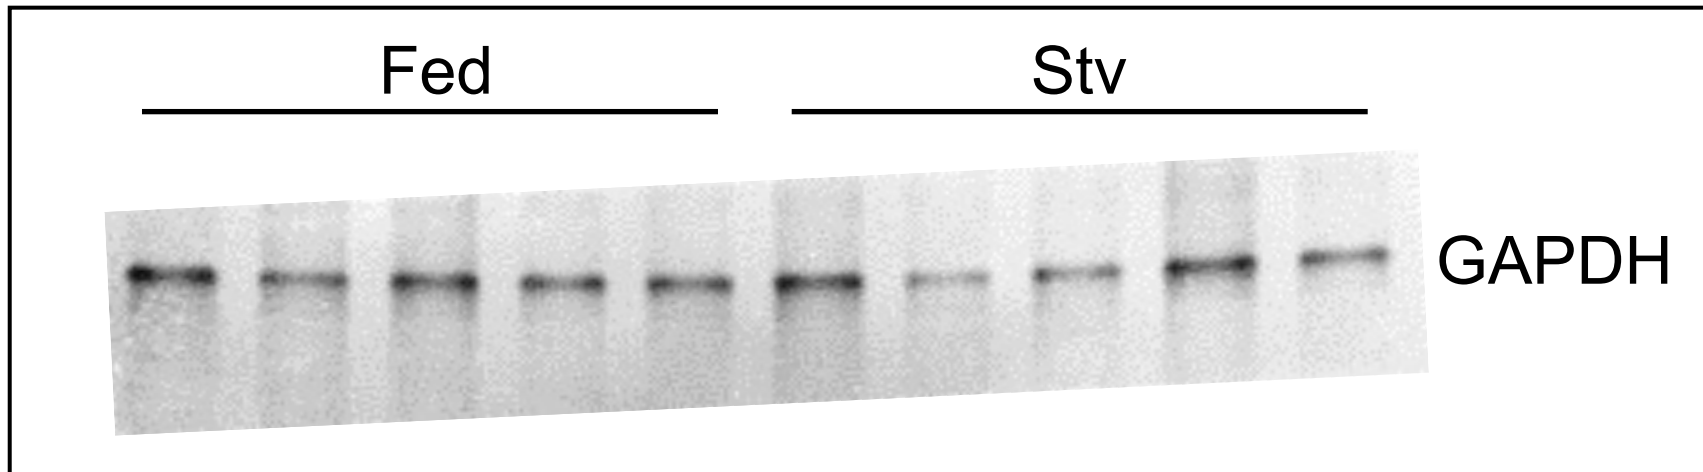

Supplement: NIHMS1825141-supplement-Source_Data_Fig_6.pdf [file NIHMS1825141-supplement-Source_Data_Fig_6.pdf]
